# Supplementary material
Source: PubMed Central journal article supplement (PMC4224630)

**A**

*esgal1*

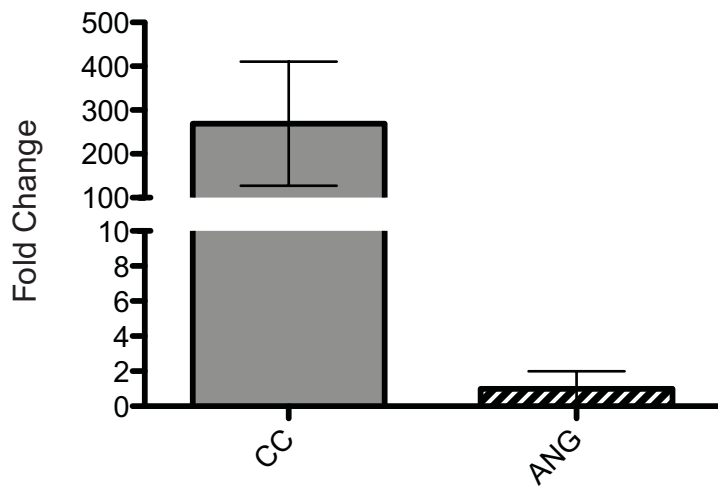

**B**

*esgal2*

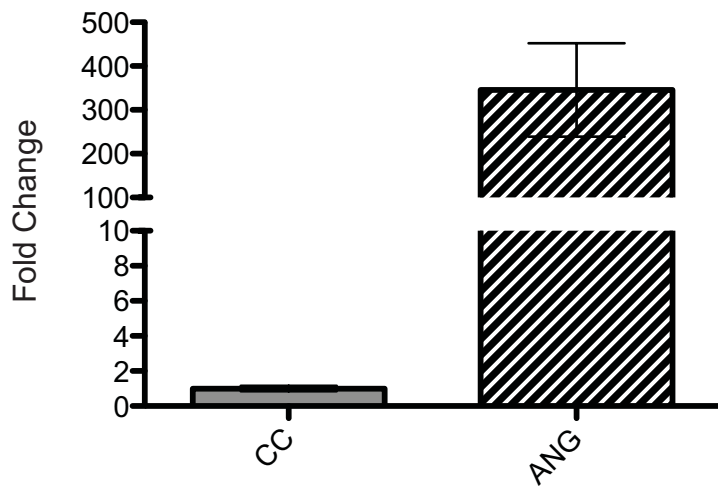

## Figure S2

### *Euprymna scolopes*

MMKIATLLCVMFGLLAFSQGARRIRRRDCGNRTYDPQFQICCSGKVRTRIGSYT  
KCCRTIAYDHRTRICCSGVVKKRPGINTGRCCRYNVVNSQYALCCAGRVTMKP  
TKRSACCKYRAYDTDNFRCFKGGKILPK

### *Balanoglossus clavigerus* (FN987614.1)

MGKKLVALILLFIVVDSFVSTDAWRRRRRRRRSSSGGSPPSGGGGGNPPVGC  
GSYDAHFSMCCSNVLVSKGGKISPACCGNQGYDAHFSMCCGSSVVSKGGKIS  
PACCGSRGYDANFSMCCGSSVSKGGKISPGCCGSRGYDANFNMCCGSNVV  
SKGGKISPACCGSVGYDARFSMCCYGIVRSRVGISPSC

### *Galaxea fascicularis* (BAC41519.1)

MSPTVSICFCSALFAVFSSCASFPRDTLSADSENVPNKLETRYRRQAPVPPVVS  
YCGGAPFSTATHICCNNGNAEPKTGSTPMCCDSNSYDPLSQICCEGTVSHKATS  
PGAMPACCASDGYDMSTQLCCNDNVMHKPTGPTALPGCCGDHSYDASVQLC  
CDSNVVPMGSLSACCGPNSYDTNTTLCCDSNVAFVSGPQAQCCGSQGYDG  
ATQLCCDSNVLPKPGATGACCGSQSYTQDTHLCCCEGVIVLKAGPSFACCGSAS  
YNQSSSLCCGATVVAKTPSKPVCCGSTSYNPVTEICCDGHVGTRAGLTSPTCC  
GGAVFDAATAKCCDGVPVFNVPSCAGLA

### *Acropora palmata* (GW202476.1)

MFKSSLTVFFLILFAHSCNAHSLTEQVEPIEIPGENRESSVVETTGAIEVPDEDN  
GDKTNVGEKDFEGQKSVKSRQRAVCGFRTYNPSFYMCCQGTVQRRSGLSP  
ACCGTRPYDAKFRMCCGGTIQSRSGLSPACCGTRPYDAKFRMCCGGTLQSRS  
GLSPACCGTRPYDAQFRMCCGGTIQSRSGLSPACCGTRPYDAQISHVLWRY  
TKQIQIETRMLRD

Figure S3

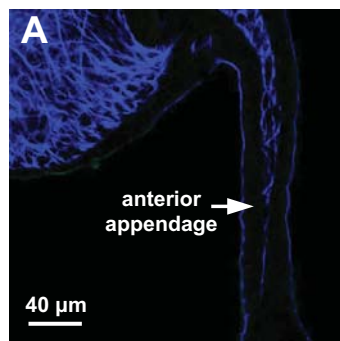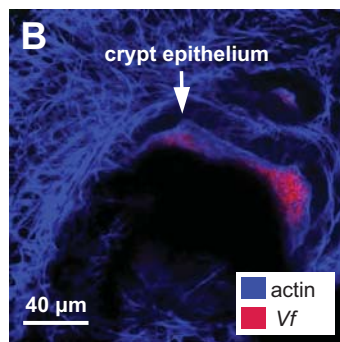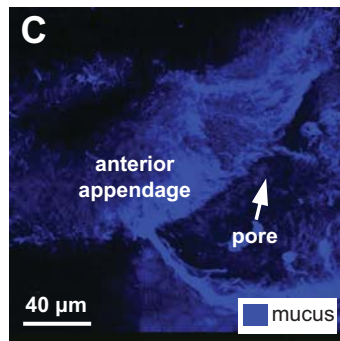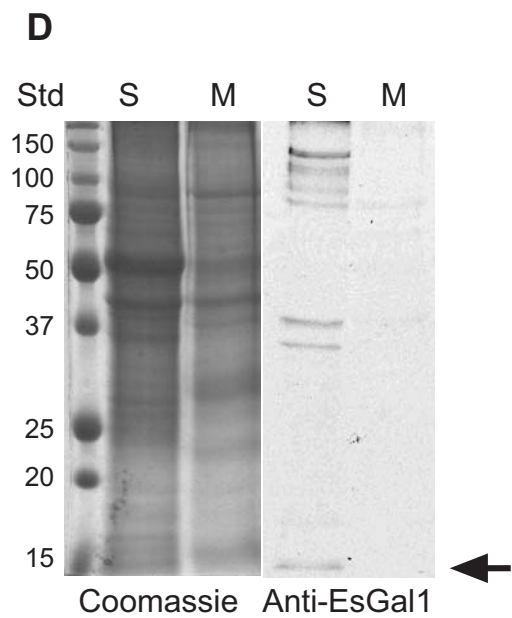

Figure S4

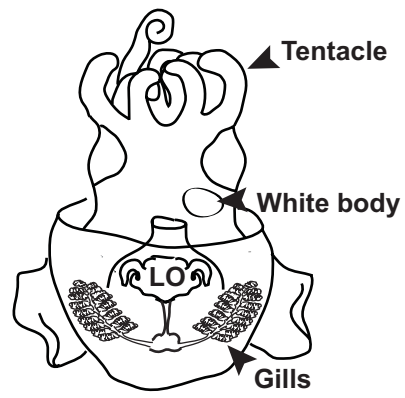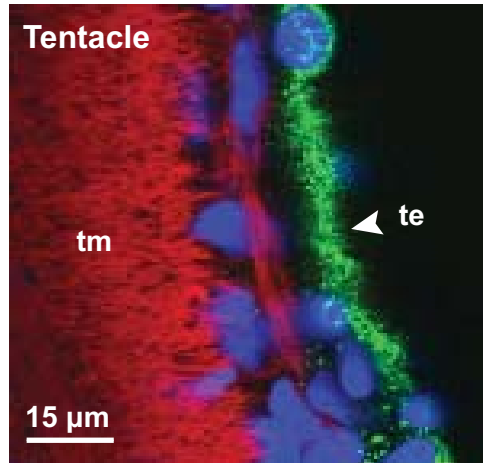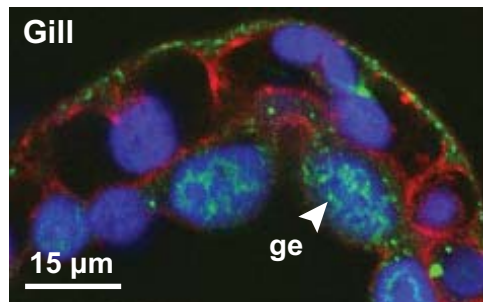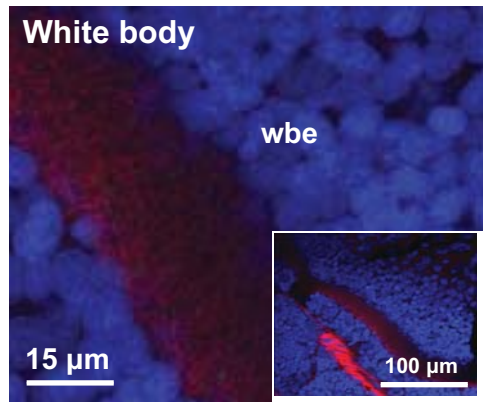

Figure S5

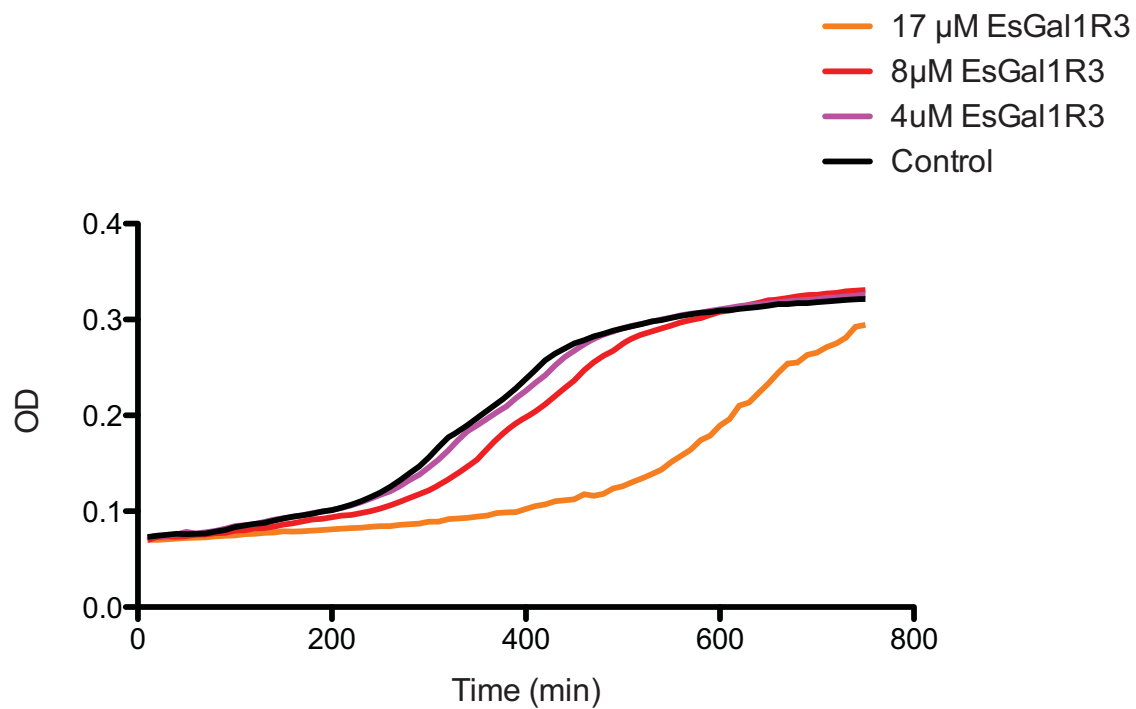

Supplement: NIHMS594223-supplement-Supp_FigureS1-S5.pdf [file NIHMS594223-supplement-Supp_FigureS1-S5.pdf]
